# Supplementary material for: Comparison of single-marker and multi-marker tests in rare variant association studies of quantitative traits
Source: PubMed Central journal article supplement (PMC5451057; doi:10.1371/journal.pone.0178504), 2017-05-31
Supplement: pone.0178504.s004.pdf [file pone.0178504.s004.pdf]

| <b>Error Distribution</b> | <b>SKAT</b>          | <b>SKAT-O</b>        | <b>Burden</b>        | <b>SMT – BH</b>       | <b>SMT – Bonferroni</b> | <b>SMT – Bonferroni MAC&gt;1</b> | <b>SMT – Bonferroni MAC&gt;2</b> |
|---------------------------|----------------------|----------------------|----------------------|-----------------------|-------------------------|----------------------------------|----------------------------------|
| $N(0,1)$                  | $4.94 \cdot 10^{-2}$ | $5.22 \cdot 10^{-2}$ | $5.01 \cdot 10^{-2}$ | $4.39 \cdot 10^{-2}$  | $4.93 \cdot 10^{-2}$    | --                               | --                               |
| $t_{(8)}$                 | $5.17 \cdot 10^{-2}$ | $5.39 \cdot 10^{-2}$ | $5.00 \cdot 10^{-2}$ | $12.68 \cdot 10^{-2}$ | $12.01 \cdot 10^{-2}$   | $6.53 \cdot 10^{-2}$             | $5.09 \cdot 10^{-2}$             |
| $t_{(4)}$                 | $6.13 \cdot 10^{-2}$ | $6.09 \cdot 10^{-2}$ | $5.00 \cdot 10^{-2}$ | $21.30 \cdot 10^{-2}$ | $20.61 \cdot 10^{-2}$   | $10.64 \cdot 10^{-2}$            | $7.57 \cdot 10^{-2}$             |
| $Log N(0,1)$              | $8.84 \cdot 10^{-2}$ | $7.95 \cdot 10^{-2}$ | $4.96 \cdot 10^{-2}$ | $33.63 \cdot 10^{-2}$ | $33.05 \cdot 10^{-2}$   | $18.88 \cdot 10^{-2}$            | $13.47 \cdot 10^{-2}$            |

S2 Table. Empirical type I error estimates of the SMT and MMTs for the nominal level  $\alpha = 0.05$  when the distribution of the phenotype is misspecified.

Data was generated from the null model with size  $n = 1,000$  for  $m = 10,000,000$  replicates, with the error distribution of the phenotype given covariates chosen to be from a standard normal (cf. Table 1),  $t_{(4)}$ ,  $t_{(8)}$ , or log standard normal distribution. All approaches were computed as described in the main manuscript assuming normally distributed error terms. Adjustments for multiple testing of all SNVs in a gene with the SMT were done using the BH and Bonferroni corrections. The type I error estimates are based on analyses using all rare and (non-causal) common SNVs in a gene, as well as restricting the analysis to SNVs with at least 2 (“MAC>1”) or 3 (“MAC>2”) observed minor alleles for the SMT. For other nominal levels (e.g.  $10^{-2}$ ,  $10^{-3}$ ,  $10^{-4}$ ,  $10^{-5}$ ,  $2.5 \cdot 10^{-6}$ ), SKAT, SKAT-O and the SMT showed similar results and inflated type I errors, with a much higher inflation for the SMT.
