# Supplementary material for: Comparison of single-marker and multi-marker tests in rare variant association studies of quantitative traits
Source: PubMed Central journal article supplement (PMC5451057; doi:10.1371/journal.pone.0178504), 2017-05-31
Supplement: pone.0178504.s005.pdf [file pone.0178504.s005.pdf]

| Scenario | Using all rare and common SNVs |        |        |       | Using all rare SNVs |        |        |       |
|----------|--------------------------------|--------|--------|-------|---------------------|--------|--------|-------|
|          | SKAT                           | SKAT-O | Burden | SMT   | SKAT                | SKAT-O | Burden | SMT   |
| 1        | 0.341                          | 0.337  | 0.107  | 0.546 | 0.358               | 0.357  | 0.242  | 0.563 |
| 2        | 0.199                          | 0.187  | 0.080  | 0.192 | 0.209               | 0.204  | 0.140  | 0.200 |
| 3        | 0.127                          | 0.124  | 0.062  | 0.100 | 0.130               | 0.130  | 0.099  | 0.106 |
| 4        | 0.532                          | 0.534  | 0.170  | 0.736 | 0.553               | 0.559  | 0.414  | 0.752 |
| 5        | 0.299                          | 0.293  | 0.102  | 0.282 | 0.316               | 0.317  | 0.230  | 0.297 |
| 6        | 0.168                          | 0.170  | 0.076  | 0.130 | 0.182               | 0.185  | 0.148  | 0.137 |
| 7        | 0.764                          | 0.783  | 0.290  | 0.907 | 0.792               | 0.815  | 0.698  | 0.917 |
| 8        | 0.477                          | 0.492  | 0.159  | 0.440 | 0.507               | 0.532  | 0.440  | 0.458 |
| 9        | 0.289                          | 0.311  | 0.115  | 0.209 | 0.308               | 0.337  | 0.284  | 0.220 |
| 10       | 0.986                          | 0.996  | 0.583  | 0.997 | 0.993               | 0.999  | 0.992  | 0.998 |
| 11       | 0.825                          | 0.895  | 0.352  | 0.730 | 0.861               | 0.928  | 0.896  | 0.755 |
| 12       | 0.580                          | 0.695  | 0.242  | 0.407 | 0.619               | 0.752  | 0.721  | 0.433 |
| 13       | 0.352                          | 0.346  | 0.113  | 0.554 | 0.368               | 0.361  | 0.245  | 0.570 |
| 14       | 0.188                          | 0.180  | 0.075  | 0.187 | 0.197               | 0.193  | 0.133  | 0.196 |
| 15       | 0.113                          | 0.108  | 0.060  | 0.094 | 0.119               | 0.113  | 0.089  | 0.099 |
| 16       | 0.516                          | 0.497  | 0.136  | 0.727 | 0.540               | 0.522  | 0.310  | 0.744 |
| 17       | 0.300                          | 0.277  | 0.086  | 0.280 | 0.318               | 0.296  | 0.170  | 0.293 |
| 18       | 0.165                          | 0.151  | 0.070  | 0.132 | 0.177               | 0.163  | 0.107  | 0.139 |
| 19       | 0.761                          | 0.747  | 0.227  | 0.903 | 0.785               | 0.777  | 0.523  | 0.913 |
| 20       | 0.473                          | 0.454  | 0.131  | 0.432 | 0.503               | 0.489  | 0.310  | 0.456 |
| 21       | 0.282                          | 0.269  | 0.093  | 0.198 | 0.297               | 0.290  | 0.196  | 0.211 |
| 22       | 0.981                          | 0.981  | 0.410  | 0.996 | 0.988               | 0.989  | 0.837  | 0.997 |
| 23       | 0.806                          | 0.811  | 0.229  | 0.713 | 0.842               | 0.849  | 0.625  | 0.737 |
| 24       | 0.541                          | 0.549  | 0.163  | 0.374 | 0.583               | 0.602  | 0.445  | 0.399 |
| 25       | 0.352                          | 0.335  | 0.098  | 0.543 | 0.367               | 0.351  | 0.200  | 0.561 |
| 26       | 0.195                          | 0.179  | 0.075  | 0.188 | 0.206               | 0.188  | 0.117  | 0.199 |
| 27       | 0.125                          | 0.114  | 0.058  | 0.093 | 0.128               | 0.117  | 0.078  | 0.098 |
| 28       | 0.528                          | 0.499  | 0.132  | 0.732 | 0.548               | 0.519  | 0.274  | 0.749 |
| 29       | 0.295                          | 0.270  | 0.084  | 0.286 | 0.314               | 0.292  | 0.159  | 0.303 |
| 30       | 0.163                          | 0.148  | 0.063  | 0.125 | 0.172               | 0.158  | 0.105  | 0.134 |
| 31       | 0.755                          | 0.727  | 0.187  | 0.903 | 0.782               | 0.752  | 0.390  | 0.914 |
| 32       | 0.460                          | 0.422  | 0.103  | 0.416 | 0.488               | 0.452  | 0.224  | 0.438 |
| 33       | 0.270                          | 0.235  | 0.076  | 0.184 | 0.289               | 0.255  | 0.136  | 0.200 |
| 34       | 0.981                          | 0.973  | 0.280  | 0.995 | 0.986               | 0.981  | 0.577  | 0.997 |
| 35       | 0.801                          | 0.763  | 0.156  | 0.692 | 0.838               | 0.802  | 0.346  | 0.718 |
| 36       | 0.526                          | 0.472  | 0.111  | 0.352 | 0.566               | 0.514  | 0.233  | 0.376 |

S3 Table. Power estimates of the SMT and MMTs under the nominal  $\alpha$  level of 0.05.

Data was generated under the alternative-hypothesis model described in scenarios 1-36 in Table 1 with size  $n = 1,000$  for  $m = 10,000$  replicates. The nominal  $\alpha$  level was set to 0.05. Adjustments for multiple testing of all SNVs in a gene with the SMT were done using the BH correction. The power results are provided for analyses using all rare and (non-causal) common SNVs in a gene, and for using all rare SNVs in a gene by excluding the common SNVs from the analysis.
