# Supplementary material for: Comparison of single-marker and multi-marker tests in rare variant association studies of quantitative traits
Source: PubMed Central journal article supplement (PMC5451057; doi:10.1371/journal.pone.0178504), 2017-05-31
Supplement: pone.0178504.s006.pdf [file pone.0178504.s006.pdf]

| Scenario | Using all rare and common SNVs |        |        |        | Using all rare SNVs |        |        |        |
|----------|--------------------------------|--------|--------|--------|---------------------|--------|--------|--------|
|          | SKAT                           | SKAT-O | Burden | SMT    | SKAT                | SKAT-O | Burden | SMT    |
| 1        | 0.118                          | 0.111  | 0.012  | 0.156  | 0.129               | 0.122  | 0.050  | 0.159  |
| 2        | 0.007                          | 0.008  | 0.002  | 0.005  | 0.008               | 0.009  | 0.004  | 0.005  |
| 3        | 0.001                          | 0.001  | <0.001 | 0.001  | 0.001               | 0.001  | 0.001  | 0.001  |
| 4        | 0.223                          | 0.215  | 0.024  | 0.263  | 0.243               | 0.235  | 0.121  | 0.268  |
| 5        | 0.021                          | 0.021  | 0.004  | 0.014  | 0.022               | 0.022  | 0.015  | 0.014  |
| 6        | 0.004                          | 0.004  | <0.001 | 0.002  | 0.003               | 0.004  | 0.002  | 0.002  |
| 7        | 0.410                          | 0.414  | 0.065  | 0.422  | 0.443               | 0.451  | 0.306  | 0.428  |
| 8        | 0.063                          | 0.071  | 0.012  | 0.043  | 0.067               | 0.077  | 0.056  | 0.045  |
| 9        | 0.014                          | 0.016  | 0.003  | 0.009  | 0.015               | 0.018  | 0.014  | 0.009  |
| 10       | 0.797                          | 0.867  | 0.207  | 0.698  | 0.849               | 0.927  | 0.874  | 0.707  |
| 11       | 0.248                          | 0.350  | 0.070  | 0.155  | 0.273               | 0.421  | 0.388  | 0.156  |
| 12       | 0.093                          | 0.128  | 0.036  | 0.059  | 0.095               | 0.147  | 0.139  | 0.060  |
| 13       | 0.124                          | 0.117  | 0.013  | 0.158  | 0.134               | 0.128  | 0.053  | 0.162  |
| 14       | 0.007                          | 0.006  | 0.001  | 0.005  | 0.007               | 0.007  | 0.003  | 0.005  |
| 15       | 0.001                          | 0.001  | 0      | 0.001  | 0.001               | 0.001  | <0.001 | 0.001  |
| 16       | 0.210                          | 0.200  | 0.016  | 0.250  | 0.227               | 0.216  | 0.068  | 0.256  |
| 17       | 0.015                          | 0.014  | 0.001  | 0.008  | 0.016               | 0.015  | 0.006  | 0.008  |
| 18       | 0.002                          | 0.002  | <0.001 | 0.001  | 0.002               | 0.002  | 0.001  | 0.001  |
| 19       | 0.393                          | 0.380  | 0.038  | 0.406  | 0.425               | 0.415  | 0.178  | 0.414  |
| 20       | 0.050                          | 0.048  | 0.007  | 0.029  | 0.055               | 0.054  | 0.028  | 0.031  |
| 21       | 0.011                          | 0.015  | 0.001  | 0.006  | 0.011               | 0.012  | 0.007  | 0.006  |
| 22       | 0.764                          | 0.771  | 0.108  | 0.667  | 0.815               | 0.828  | 0.522  | 0.678  |
| 23       | 0.203                          | 0.212  | 0.038  | 0.110  | 0.228               | 0.246  | 0.159  | 0.111  |
| 24       | 0.057                          | 0.063  | 0.015  | 0.035  | 0.060               | 0.067  | 0.053  | 0.035  |
| 25       | 0.123                          | 0.114  | 0.009  | 0.161  | 0.137               | 0.128  | 0.035  | 0.164  |
| 26       | 0.007                          | 0.006  | <0.001 | 0.004  | 0.008               | 0.007  | 0.002  | 0.005  |
| 27       | <0.001                         | <0.001 | 0      | <0.001 | 0.001               | <0.001 | <0.001 | <0.001 |
| 28       | 0.212                          | 0.199  | 0.015  | 0.252  | 0.231               | 0.217  | 0.060  | 0.257  |
| 29       | 0.016                          | 0.014  | 0.001  | 0.009  | 0.018               | 0.015  | 0.005  | 0.009  |
| 30       | 0.002                          | 0.001  | <0.001 | 0.001  | 0.001               | 0.001  | 0.001  | 0.001  |
| 31       | 0.393                          | 0.375  | 0.025  | 0.403  | 0.424               | 0.405  | 0.105  | 0.411  |
| 32       | 0.039                          | 0.034  | 0.004  | 0.020  | 0.045               | 0.038  | 0.013  | 0.021  |
| 33       | 0.006                          | 0.006  | 0      | 0.003  | 0.006               | 0.006  | 0.003  | 0.003  |
| 34       | 0.746                          | 0.732  | 0.047  | 0.661  | 0.792               | 0.782  | 0.207  | 0.671  |
| 35       | 0.166                          | 0.147  | 0.009  | 0.068  | 0.187               | 0.165  | 0.042  | 0.070  |
| 36       | 0.035                          | 0.031  | 0.004  | 0.016  | 0.038               | 0.033  | 0.012  | 0.017  |

S4 Table. Power estimates of the SMT and MMTs under the nominal  $\alpha$  level of  $2.5 \cdot 10^{-6}$ .

Data was generated under the alternative-hypothesis model described in scenarios 1-36 in Table 1 with size  $n = 1,000$  for  $m = 10,000$  replicates. The nominal  $\alpha$  level was set to  $2.5 \cdot 10^{-6}$ . Adjustments for multiple testing of all SNVs in a gene with the SMT were done using the BH correction. Power results are provided for analyses using all rare and (non-causal) common SNVs in a gene, and for using all rare SNVs in a gene by excluding the common SNVs from the analysis.
