# Supplementary material for: Comparison of single-marker and multi-marker tests in rare variant association studies of quantitative traits
Source: PubMed Central journal article supplement (PMC5451057; doi:10.1371/journal.pone.0178504), 2017-05-31
Supplement: pone.0178504.s007.pdf [file pone.0178504.s007.pdf]

| Scenario | Using all rare and common SNVs |        |        |       | Using all rare SNVs |        |        |       |
|----------|--------------------------------|--------|--------|-------|---------------------|--------|--------|-------|
|          | SKAT                           | SKAT-O | Burden | SMT   | SKAT                | SKAT-O | Burden | SMT   |
| 1        | 0.276                          | 0.271  | 0.063  | 0.558 | 0.282               | 0.280  | 0.173  | 0.561 |
| 2        | 0.153                          | 0.148  | 0.027  | 0.195 | 0.160               | 0.155  | 0.077  | 0.196 |
| 3        | 0.060                          | 0.058  | 0.011  | 0.047 | 0.062               | 0.061  | 0.029  | 0.048 |
| 4        | 0.462                          | 0.463  | 0.117  | 0.774 | 0.473               | 0.480  | 0.341  | 0.777 |
| 5        | 0.269                          | 0.265  | 0.053  | 0.315 | 0.279               | 0.276  | 0.162  | 0.318 |
| 6        | 0.117                          | 0.116  | 0.024  | 0.088 | 0.124               | 0.123  | 0.075  | 0.090 |
| 7        | 0.722                          | 0.764  | 0.243  | 0.934 | 0.737               | 0.792  | 0.677  | 0.936 |
| 8        | 0.484                          | 0.497  | 0.109  | 0.517 | 0.505               | 0.524  | 0.387  | 0.521 |
| 9        | 0.252                          | 0.266  | 0.063  | 0.167 | 0.269               | 0.290  | 0.208  | 0.170 |
| 10       | 0.984                          | 0.999  | 0.583  | 0.999 | 0.990               | 1      | 0.997  | 1     |
| 11       | 0.862                          | 0.938  | 0.309  | 0.813 | 0.883               | 0.965  | 0.931  | 0.816 |
| 12       | 0.632                          | 0.765  | 0.178  | 0.374 | 0.664               | 0.827  | 0.771  | 0.379 |

S5 Table. Power estimates of the SMT and MMTs under the nominal  $\alpha$  level of  $2.5 \cdot 10^{-6}$ , for a sample size of 5,000 and genes including 58 SNVs on average.

Data was generated under the alternative-hypothesis model described in scenarios 1-12 in Table 1 with size  $n = 5,000$  for  $m = 10,000$  replicates. The analyzed genes in the replicates included on average 58 SNVs. The nominal  $\alpha$  level was set to  $2.5 \cdot 10^{-6}$ . Adjustments for multiple testing of all SNVs in a gene with the SMT were done using the BH correction. Power results are provided for analyses using all rare and (non-causal) common SNVs in a gene, and for using all rare SNVs in a gene by excluding the common SNVs from the analysis.
