# Supplementary material for: Comparison of single-marker and multi-marker tests in rare variant association studies of quantitative traits
Source: PubMed Central journal article supplement (PMC5451057; doi:10.1371/journal.pone.0178504), 2017-05-31
Supplement: pone.0178504.s008.pdf [file pone.0178504.s008.pdf]

| Scenario | Using all rare and common SNVs |        |        |       | Using all rare SNVs |        |        |       |
|----------|--------------------------------|--------|--------|-------|---------------------|--------|--------|-------|
|          | SKAT                           | SKAT-O | Burden | SMT   | SKAT                | SKAT-O | Burden | SMT   |
| 1        | 0.861                          | 0.865  | 0.304  | 0.998 | 0.872               | 0.876  | 0.724  | 0.998 |
| 2        | 0.622                          | 0.615  | 0.191  | 0.782 | 0.664               | 0.660  | 0.500  | 0.784 |
| 3        | 0.387                          | 0.391  | 0.133  | 0.335 | 0.414               | 0.425  | 0.329  | 0.339 |
| 4        | 0.989                          | 0.992  | 0.468  | 1     | 0.992               | 0.995  | 0.9630 | 1     |
| 5        | 0.887                          | 0.895  | 0.304  | 0.936 | 0.915               | 0.930  | 0.854  | 0.937 |
| 6        | 0.694                          | 0.717  | 0.241  | 0.605 | 0.737               | 0.775  | 0.692  | 0.608 |
| 7        | 1                              | 1      | 0.681  | 1     | 1                   | 1      | 1      | 1     |
| 8        | 0.994                          | 0.998  | 0.480  | 0.994 | 0.997               | 1      | 0.997  | 0.994 |
| 9        | 0.944                          | 0.971  | 0.364  | 0.874 | 0.971               | 0.991  | 0.982  | 0.874 |
| 10       | 1                              | 1      | 0.877  | 1     | 1                   | 1      | 1      | 1     |
| 11       | 1                              | 1      | 0.788  | 1     | 1                   | 1      | 1      | 1     |
| 12       | 1                              | 1      | 0.679  | 0.998 | 1                   | 1      | 1      | 0.998 |

S6 Table. Power estimates of the SMT and MMTs under the nominal  $\alpha$  level of  $2.5 \cdot 10^{-6}$ , for a sample size of 5,000 and genes including 572 SNVs on average.

Data was generated under the alternative-hypothesis model described in scenarios 1-12 in Table 1 with size  $n = 5,000$  for  $m = 10,000$  replicates. The analyzed genes in the replicates included on average 572 SNVs. The nominal  $\alpha$  level was set to  $2.5 \cdot 10^{-6}$ . Adjustments for multiple testing of all SNVs in a gene with the SMT were done using the BH correction. Power results are provided for analyses using all rare and (non-causal) common SNVs in a gene, and for using all rare SNVs in a gene by excluding the common SNVs from the analysis.
