# Supplementary material for: Comparison of single-marker and multi-marker tests in rare variant association studies of quantitative traits
Source: PubMed Central journal article supplement (PMC5451057; doi:10.1371/journal.pone.0178504), 2017-05-31
Supplement: pone.0178504.s009.pdf [file pone.0178504.s009.pdf]

| <b>Scenario</b> | <b>SKAT</b> | <b>SKAT-O</b> | <b>Burden</b> | <b>SMT</b> |
|-----------------|-------------|---------------|---------------|------------|
| 1               | 0.363       | 0.350         | 0.002         | 0.515      |
| 4               | 0.565       | 0.554         | 0.006         | 0.715      |
| 7               | 0.860       | 0.864         | 0.041         | 0.928      |
| 8               | 0.388       | 0.406         | 0.002         | 0.190      |
| 12              | 0.531       | 0.733         | 0.002         | 0.231      |

S7 Table. Power estimates of the SMT and MMTs under the nominal  $\alpha$  level of  $2.5 \cdot 10^{-6}$ , for a sample size of 2,000 and genes including 67 SNVs.

As genetic data, the available genotypes of the 67 SNVs of  $n = 2,000$  individuals in the 'SKAT.example' data in the SKAT R package were used in each replicate. Data was generated under the alternative-hypothesis model described in scenarios 1, 4, 7, 8, 12 in Table 1 with size  $n = 2,000$  for  $m = 10,000$  replicates. The nominal  $\alpha$  level was set to  $2.5 \cdot 10^{-6}$ . Adjustments for multiple testing of all SNVs in a gene with the SMT were done using the BH correction. Power results are provided for analyses using all rare and (non-causal) common SNVs in a gene.
