# Supplementary material for: Comparison of single-marker and multi-marker tests in rare variant association studies of quantitative traits
Source: PubMed Central journal article supplement (PMC5451057; doi:10.1371/journal.pone.0178504), 2017-05-31
Supplement: pone.0178504.s010.pdf [file pone.0178504.s010.pdf]

| Scenario | SKAT  | SKAT-O | Burden | SMT – BH | SMT – Bonferroni |
|----------|-------|--------|--------|----------|------------------|
| 1        | 0.118 | 0.111  | 0.012  | 0.156    | 0.153            |
| 2        | 0.007 | 0.008  | 0.002  | 0.005    | 0.004            |
| 3        | 0.001 | 0.001  | <0.001 | 0.001    | <0.001           |
| 4        | 0.223 | 0.215  | 0.024  | 0.263    | 0.259            |
| 5        | 0.021 | 0.021  | 0.004  | 0.014    | 0.011            |
| 6        | 0.004 | 0.004  | <0.001 | 0.002    | 0.002            |
| 7        | 0.410 | 0.414  | 0.065  | 0.422    | 0.415            |
| 8        | 0.063 | 0.071  | 0.012  | 0.043    | 0.040            |
| 9        | 0.014 | 0.016  | 0.003  | 0.009    | 0.007            |
| 10       | 0.797 | 0.867  | 0.207  | 0.698    | 0.692            |
| 11       | 0.248 | 0.350  | 0.070  | 0.155    | 0.147            |
| 12       | 0.093 | 0.128  | 0.036  | 0.059    | 0.053            |

S8 Table. Power estimates of the SMT and MMTs under the nominal  $\alpha$  level of  $2.5 \cdot 10^{-6}$  to compare the BH and Bonferroni correction for SMTs.

Data was generated under the alternative-hypothesis model described in scenarios 1-12 in Table 1 with size  $n = 1,000$  for  $m = 10,000$  replicates. The nominal  $\alpha$  level was set to  $2.5 \cdot 10^{-6}$ . Adjustments for multiple testing of all SNVs in a gene with the SMT were done using the BH or the Bonferroni correction. Power results are provided for analyses using all rare and (non-causal) common SNVs in a gene.
