# Supplementary material for: Comparison of single-marker and multi-marker tests in rare variant association studies of quantitative traits
Source: PubMed Central journal article supplement (PMC5451057; doi:10.1371/journal.pone.0178504), 2017-05-31
Supplement: pone.0178504.s011.pdf [file pone.0178504.s011.pdf]

| <b>Scenario</b> | <b>SKAT</b> | <b>SKAT-O</b> | <b>Burden</b> | <b>SMT</b> |
|-----------------|-------------|---------------|---------------|------------|
| 1               | 0.166       | 0.157         | 0.070         | 0.062      |
| 4               | 0.247       | 0.238         | 0.086         | 0.097      |
| 7               | 0.397       | 0.408         | 0.139         | 0.162      |
| 8               | 0.164       | 0.178         | 0.083         | 0.043      |
| 12              | 0.200       | 0.270         | 0.112         | 0.051      |

S9 Table. Power estimates of the SMT and MMTs for analyzing a binary trait under the nominal  $\alpha$  level of 0.05.

Case-control data was generated under the alternative-hypothesis model described in scenarios 1, 4, 7, 8, 12 in Table 1 with size  $n = 1,000$  for  $m = 10,000$  replicates. The nominal  $\alpha$  level was set to 0.05. Adjustments for multiple testing of all SNVs in a gene with the SMT were done using the BH correction. All rare and (non-causal) common SNVs were incorporated in the analysis.
