# Supplementary material for: Comparison of single-marker and multi-marker tests in rare variant association studies of quantitative traits
Source: PubMed Central journal article supplement (PMC5451057; doi:10.1371/journal.pone.0178504), 2017-05-31
Supplement: pone.0178504.s012.pdf [file pone.0178504.s012.pdf]

| <b>Scenario</b> | <b>SKAT</b> | <b>SKAT-O</b> | <b>Burden</b> | <b>SMT</b> |
|-----------------|-------------|---------------|---------------|------------|
| 1               | 0.003       | 0.003         | <0.001        | 0          |
| 4               | 0.009       | 0.009         | 0.001         | 0          |
| 7               | 0.029       | 0.032         | 0.005         | <0.001     |
| 8               | 0.002       | 0.002         | <0.001        | 0          |
| 12              | 0.003       | 0.005         | <0.001        | 0          |

S10 Table. Power estimates of the SMT and MMTs for analyzing a binary trait under the nominal  $\alpha$  level of  $2.5 \cdot 10^{-6}$ .

Case-control data was generated under the alternative-hypothesis model described in scenarios 1, 4, 7, 8, 12 in Table 1 with size  $n = 1,000$  for  $m = 10,000$  replicates for a binary trait. The nominal  $\alpha$  level was set to  $2.5 \cdot 10^{-6}$ . Adjustments for multiple testing of all SNVs in a gene with the SMT were done using the BH correction. All rare and (non-causal) common SNVs were incorporated in the analysis.
