# Supplementary material for: Comparison of single-marker and multi-marker tests in rare variant association studies of quantitative traits
Source: PubMed Central journal article supplement (PMC5451057; doi:10.1371/journal.pone.0178504), 2017-05-31
Supplement: pone.0178504.s013.pdf [file pone.0178504.s013.pdf]

| Scenario | Gene-level |       | SNV-level                        |                                  |
|----------|------------|-------|----------------------------------|----------------------------------|
|          | SKAT-O     | SMT   | SMT for SNVs with<br>MAF = 0.002 | SMT for SNVs with<br>MAF = 0.005 |
| 13       | 0.117      | 0.158 | 0.022                            | 0.188                            |
| 14       | 0.006      | 0.005 | 0                                | 0                                |
| 15       | 0.001      | 0.001 | 0                                | 0.010                            |
| 16       | 0.200      | 0.250 | 0.016                            | 0.220                            |
| 17       | 0.014      | 0.008 | 0                                | 0.006                            |
| 18       | 0.002      | 0.001 | 0                                | 0                                |
| 19       | 0.380      | 0.406 | 0.022                            | 0.203                            |
| 20       | 0.048      | 0.029 | 0                                | 0.034                            |
| 21       | 0.015      | 0.006 | 0                                | 0.005                            |
| 22       | 0.771      | 0.667 | 0.023                            | 0.225                            |
| 23       | 0.212      | 0.110 | <0.001                           | 0.055                            |
| 24       | 0.063      | 0.035 | 0                                | 0.010                            |

S11 Table. Comparison of power estimates for identifying a causal gene and a causal SNV with a given MAF.

Data was generated under the alternative-hypothesis model described in scenarios 13-24 in Table 1 with size  $n = 1,000$  for  $m = 10,000$  replicates. The nominal  $\alpha$  was set to  $2.5 \cdot 10^{-6}$  for the gene-level evaluation of SMT and SKAT-O (representing the Bonferroni-correction for testing 20,000 genes), cf. Fig 2, and to  $10^{-7}$  for the SNV-level evaluation of SMT (representing the Bonferroni-correction for testing 500,000 SNVs). Adjustments for multiple testing of all SNVs in a gene were done using the BH-correction. The power of the SMT for identifying a causal SNV with a given MAF is based on all causal SNVs in the  $m = 10,000$  replicates with the specified MAF. It is estimated by the number of significant causal SNVs (with p-values smaller than  $10^{-7}$ ) divided by the total number of causal SNVs with the specified MAF. The power for testing singletons and doubletons is even smaller than the power of testing SNVs with  $MAF = 0.002$ .
