# Supplementary material for: Comparison of single-marker and multi-marker tests in rare variant association studies of quantitative traits
Source: PubMed Central journal article supplement (PMC5451057; doi:10.1371/journal.pone.0178504), 2017-05-31
Supplement: pone.0178504.s014.pdf [file pone.0178504.s014.pdf]

| <b>Scenario</b> | <b>SNV with<br/>MAF = 0.0005</b> | <b>SNV with<br/>MAF = 0.001</b> | <b>SNV with<br/>MAF = 0.002</b> | <b>SNV with<br/>MAF = 0.005</b> |
|-----------------|----------------------------------|---------------------------------|---------------------------------|---------------------------------|
| 13              | 0.133                            | 0.280                           | 0.555                           | 0.875                           |
| 14              | 0.020                            | 0.033                           | 0.055                           | 0.200                           |
| 15              | 0.008                            | 0.011                           | 0.022                           | 0.039                           |
| 16              | 0.131                            | 0.283                           | 0.542                           | 0.873                           |
| 17              | 0.015                            | 0.032                           | 0.072                           | 0.179                           |
| 18              | 0.009                            | 0.008                           | 0.022                           | 0.052                           |
| 19              | 0.127                            | 0.268                           | 0.506                           | 0.859                           |
| 20              | 0.018                            | 0.033                           | 0.069                           | 0.290                           |
| 21              | 0.008                            | 0.010                           | 0.021                           | 0.082                           |
| 22              | 0.114                            | 0.237                           | 0.461                           | 0.801                           |
| 23              | 0.021                            | 0.037                           | 0.072                           | 0.267                           |
| 24              | 0.009                            | 0.014                           | 0.025                           | 0.158                           |

S12 Table. Conditional power estimates of the SMT for identifying a causal SNV, given that the gene contains a causal SNV.

Data was generated under an alternative-hypothesis model described in scenarios 13-24 in Table 1 with size  $n = 1,000$  for  $m = 10,000$  replicates. The nominal  $\alpha$  level was set to 0.002, representing the Bonferroni-correction for testing 25 SNVs in a gene (assuming 500,000 SNVs in total within 20,000 genes). The power of the SMT for identifying a causal SNV with a given MAF is based on all causal SNVs in the  $m = 10,000$  replicates with the specified MAF. It is estimated by the number of significant causal SNVs (with p-values smaller than 0.002) divided by the total number of causal SNVs with the specified MAF.
